# Supplementary material for: Psychobehavioural and Cognitive Adverse Events of Anti-Seizure Medications for the Treatment of Developmental and Epileptic Encephalopathies
Source: Springer Nature journal article supplement (doi:10.1007/s40263-022-00955-9), 2022-10-01
Supplement: MOESM1 [file 40263_2022_955_MOESM1_ESM.pdf]

**On-line resource:**

**Psychobehavioral and cognitive adverse events of anti-seizure medications for the treatment of developmental and epileptic encephalopathies**

Adam Strzelczyk, MD, MHBA<sup>1,2</sup> and Susanne Schubert-Bast, MD<sup>1,2,3</sup>

<sup>1</sup>Epilepsy Center Frankfurt Rhine-Main, Center of Neurology and Neurosurgery, Goethe-University and University Hospital Frankfurt, Frankfurt am Main, Germany

<sup>2</sup>LOEWE Center for Personalized and Translational Epilepsy Research (CePTER), Goethe-University Frankfurt, Frankfurt am Main, Germany

<sup>3</sup>Department of Neuropediatrics, Goethe-University and University Hospital Frankfurt, Frankfurt am Main, Germany

|        |                       |                     |
|--------|-----------------------|---------------------|
| ORCID: | Adam Strzelczyk       | 0000-0001-6288-9915 |
|        | Susanne Schubert-Bast | 0000-0003-1545-7364 |

Correspondence to: Prof. Dr. med. Adam Strzelczyk  
Epilepsy Center Frankfurt Rhine-Main  
Goethe-University Frankfurt  
Schleusenweg 2-16  
60528 Frankfurt am Main, Germany  
phone: +49-69-6301-7466  
fax: +49-69-6301-84466  
mail: [strzelczyk@med.uni-frankfurt.de](mailto:strzelczyk@med.uni-frankfurt.de)

**Supplemental Table S1: Evidence of ASM-associated PBAEs**

| ASM Generation                                  | Cochrane review of RCTs for adjunctive therapy in DRE: AEs significantly associated with ASM                                                                                                                                                                                                                                                                                                                                                                                                                                                                                                                                                                                                                                                                                                                        | Chen et al: observational study of PBAEs /discontinuations due to PBAEs                                                    |                                             | Steinhoff et al [1]: SLR of observational studies evaluating irritability, anger, or aggression with BRV, LEV, PER, and TPM in adults with epilepsy: weighted mean incidences/discontinuation rates |
|-------------------------------------------------|---------------------------------------------------------------------------------------------------------------------------------------------------------------------------------------------------------------------------------------------------------------------------------------------------------------------------------------------------------------------------------------------------------------------------------------------------------------------------------------------------------------------------------------------------------------------------------------------------------------------------------------------------------------------------------------------------------------------------------------------------------------------------------------------------------------------|----------------------------------------------------------------------------------------------------------------------------|---------------------------------------------|-----------------------------------------------------------------------------------------------------------------------------------------------------------------------------------------------------|
|                                                 |                                                                                                                                                                                                                                                                                                                                                                                                                                                                                                                                                                                                                                                                                                                                                                                                                     | Adults with epilepsy (80% with DREs)* [2]                                                                                  | Children with epilepsy (80% with DREs)† [3] |                                                                                                                                                                                                     |
| Valproate (VPA)                                 | -                                                                                                                                                                                                                                                                                                                                                                                                                                                                                                                                                                                                                                                                                                                                                                                                                   | N=868<br>3.5%/0.9%                                                                                                         | N=285<br>8.4%/3.2%                          | -                                                                                                                                                                                                   |
| Clobazam (CLB)                                  | Limited data: drowsiness most common [4]                                                                                                                                                                                                                                                                                                                                                                                                                                                                                                                                                                                                                                                                                                                                                                            | N=645<br>4.5%/0.9%                                                                                                         | N=89<br>2.3%/2.3%                           | -                                                                                                                                                                                                   |
| Topiramate (TPM)                                | 12 trials (1650 participants) identified. Ataxia 2.29 (99% CI 1.10 to 4.77; 4 studies); <b>concentration difficulties 7.81 (99% CI 2.08 to 29.29; 6 studies; moderate-certainty evidence)</b> ; dizziness 1.52 (99% CI 1.07 to 2.16; 8 studies); fatigue 2.08 (99% CI 1.37 to 3.15; 10 studies); paraesthesia 3.65 (99% CI 1.58 to 8.39; 7 studies; moderate-certainty evidence); <b>somnolence 2.44 (99% CI 1.61 to 3.68; 9 studies); 'thinking abnormally' 5.70 (99% CI 2.26 to 14.38; 4 studies; high-certainty evidence)</b> ; and weight loss 3.99 (99% CI 1.82 to 8.72; 9 studies; low-certainty evidence) [5]                                                                                                                                                                                                | N=639<br>6.3%/2.5%                                                                                                         | N=212<br>6.1%/0.9%                          | Irritability: 3.1%/ 2.2%<br>Anger: 0.2%/0%<br>Aggression: 0.5%/1.2%                                                                                                                                 |
| Cannabidiol (CBD) (+CLB for DS & LGS in the EU) | -                                                                                                                                                                                                                                                                                                                                                                                                                                                                                                                                                                                                                                                                                                                                                                                                                   | -                                                                                                                          | -                                           | -                                                                                                                                                                                                   |
| Fenfluramine (FFA)                              | -                                                                                                                                                                                                                                                                                                                                                                                                                                                                                                                                                                                                                                                                                                                                                                                                                   | -                                                                                                                          | -                                           | -                                                                                                                                                                                                   |
| Levetiracetam (LEV)                             | 14 trials (2455 participants) identified. Overall: <b>somnolence: 13% (RR 1.62, 99% CI 1.19 to 2.20; P &lt; 0.00001, I<sup>2</sup> = 0%; moderate-certainty evidence)</b> ; headache: affected 8% of participants (RR 0.85, 99% CI 0.59 to 1.21; P = 0.23, I <sup>2</sup> = 66%; low-certainty evidence); dizziness: affected 7% of participants (RR 1.54, 99% CI 0.98 to 2.41; P = 0.01, I <sup>2</sup> = 15%; moderate-certainty evidence); fatigue (asthenia): affected 6% of participants (RR 1.53, 99% CI 0.98 to 2.38; P = 0.01, I <sup>2</sup> = 0%; moderate-certainty evidence); accidental injury: affected 6% of participants (pooled RR 0.72, 99% CI 0.49 to 1.06; P = 0.03, I <sup>2</sup> = 60%; low-certainty evidence). Combined behavioural AEs: 4.53% (RR 1.87, 99% CI 1.19 to 2.95; P = 0.0004). | N=1890<br>22.1%/8.3%<br>Higher rates of irritability, depressive mood, anxiety, aggression, and other behavioral problems. | N=308<br>16.2%/6.8%                         | Irritability: 9.9%/ 3.4%<br>Anger: 2.5%/0%<br>Aggression: 2.6%/2.4%                                                                                                                                 |

| ASM Generation     | Cochrane review of RCTs for adjunctive therapy in DRE: AEs significantly associated with ASM                                                                                                                                                                                                                                                                                                                                                                                                                                                                                                                                                                                                                                                                                                                                                   | Chen et al: observational study of PBAEs /discontinuations due to PBAEs                  |                                             | Steinhoff et al [1]: SLR of observational studies evaluating irritability, anger, or aggression with BRV, LEV, PER, and TPM in adults with epilepsy: weighted mean incidences/discontinuation rates                                     |
|--------------------|------------------------------------------------------------------------------------------------------------------------------------------------------------------------------------------------------------------------------------------------------------------------------------------------------------------------------------------------------------------------------------------------------------------------------------------------------------------------------------------------------------------------------------------------------------------------------------------------------------------------------------------------------------------------------------------------------------------------------------------------------------------------------------------------------------------------------------------------|------------------------------------------------------------------------------------------|---------------------------------------------|-----------------------------------------------------------------------------------------------------------------------------------------------------------------------------------------------------------------------------------------|
|                    |                                                                                                                                                                                                                                                                                                                                                                                                                                                                                                                                                                                                                                                                                                                                                                                                                                                | Adults with epilepsy (80% with DREs)* [2]                                                | Children with epilepsy (80% with DREs)† [3] |                                                                                                                                                                                                                                         |
|                    | <p>Children: <b>somnolence (RR 1.90, 99% CI 0.88 to 4.09; P = 0.03)</b>, vomiting (RR 1.22, 99% CI 0.55 to 2.69; P = 0.52), pharyngitis (RR 1.09, 99% CI 0.47 to 2.50; P = 0.79), <b>aggression (hostility) (RR 1.72, 99% CI 0.64 to 4.63; P = 0.16)</b>, and accidental injury (RR 1.63, 99% CI 0.63 to 4.26; P = 0.19).</p> <p><b>Combined behavioural AEs in children: 22.64% (RR 1.90, 99% CI 1.16 to 3.11; P = 0.0009)</b><br/>           Combined behavioural AEs in adults: 1% (RR 1.79, 99% CI 0.59 to 5.41, P=0.17)</p> <p><b>LEV was not significantly associated with an increased risk of any individual PBAEs alone, the most frequent being hostility, personality disorder, nervousness, depression, aggression, agitation, emotional lability, and psychomotor hyperactivity, each occurring in 1-0.5% of patients [6]</b></p> |                                                                                          |                                             |                                                                                                                                                                                                                                         |
| Brivaracetam (BRV) | <p>6 trials (2411 participants) identified.</p> <p>Risk of individual AEs not reported [7]</p>                                                                                                                                                                                                                                                                                                                                                                                                                                                                                                                                                                                                                                                                                                                                                 | -                                                                                        | -                                           | <p>Irritability: 5.6%/0.8%<br/>           Anger: 3.3%/0%<br/>           Aggression: 2.5%/0.8%</p> <p>Switching from LEV to BRV improved PBAEs in 33.3–83.0% of patients (weighted mean=66.6% across 5 observational studies, n=156)</p> |
| Zonisamide (ZNS)   | <p>8 trials (1636 participants) identified.</p> <p>Ataxia (RR 3.85, 99% CI 1.36 to 10.93; 4 trials, 734 participants; low-certainty evidence); <b>somnolence (RR 1.52, 99% CI 1.00 to 2.31; 8 trials, 1636 participants; moderate-certainty evidence); agitation (RR 2.35, 99% CI 1.05 to 5.27; 4 trials, 598 participants; low-certainty evidence);</b> and anorexia (RR 2.74, 99% CI 1.64 to 4.60; 6 trials, 1181 participants; low-certainty evidence) [8]</p>                                                                                                                                                                                                                                                                                                                                                                              | <p><b>N=760</b><br/> <b>9.7%/4.9%</b><br/>           Higher rates of depressive mood</p> | <p><b>N=164</b><br/> <b>9.8%/6.7%</b></p>   | -                                                                                                                                                                                                                                       |
| Perampanel (PER)   | -                                                                                                                                                                                                                                                                                                                                                                                                                                                                                                                                                                                                                                                                                                                                                                                                                                              | -                                                                                        | -                                           | <p>Irritability: 12.3%/ 3.0%<br/>           Anger: 2.0%/0%<br/>           Aggression: 4.4%/9.2%</p>                                                                                                                                     |

| ASM Generation               | Cochrane review of RCTs for adjunctive therapy in DRE: AEs significantly associated with ASM                                                                                                                                                                                                                                                                                                                                                                                                                                                                                                                                                                                                                         | Chen et al: observational study of PBAEs /discontinuations due to PBAEs |                                             | Steinhoff et al [1]: SLR of observational studies evaluating irritability, anger, or aggression with BRV, LEV, PER, and TPM in adults with epilepsy: weighted mean incidences/discontinuation rates |
|------------------------------|----------------------------------------------------------------------------------------------------------------------------------------------------------------------------------------------------------------------------------------------------------------------------------------------------------------------------------------------------------------------------------------------------------------------------------------------------------------------------------------------------------------------------------------------------------------------------------------------------------------------------------------------------------------------------------------------------------------------|-------------------------------------------------------------------------|---------------------------------------------|-----------------------------------------------------------------------------------------------------------------------------------------------------------------------------------------------------|
|                              |                                                                                                                                                                                                                                                                                                                                                                                                                                                                                                                                                                                                                                                                                                                      | Adults with epilepsy (80% with DREs)* [2]                               | Children with epilepsy (80% with DREs)† [3] |                                                                                                                                                                                                     |
| Ethosuximide (ESM)           | -                                                                                                                                                                                                                                                                                                                                                                                                                                                                                                                                                                                                                                                                                                                    | -                                                                       | N=28<br>14.3%/7.1%                          | -                                                                                                                                                                                                   |
| Stiripentol (STP) (+VPA+CLB) | One study identified: Neurological adverse effects (RR 2.65, 95% CI 0.88 to 8.01; gastrointestinal adverse effects (RR 11.56, 95% CI 0.71 to 189.36); CIs are wide [9]                                                                                                                                                                                                                                                                                                                                                                                                                                                                                                                                               | -                                                                       | -                                           | -                                                                                                                                                                                                   |
| Rufinamide (RUF)             | 6 trials (1759 participants) identified. Headache 1.36 (95% CI 1.08 to 1.69; 3 RCTs, 1228 participants; high-certainty evidence); dizziness 2.52 (95% CI 1.90 to 3.34; 3 RCTs, 1295 participants; moderate-certainty evidence); <b>somnolence 1.94 (95% CI 1.44 to 2.61; 6 RCTs, 1759 participants; moderate-certainty evidence)</b> ; vomiting 2.95 (95% CI 1.80 to 4.82; 4 RCTs, 777 participants; low-certainty evidence); nausea 1.87 (95% CI 1.33 to 2.64; 3 RCTs, 1295 participants; moderate-certainty evidence); fatigue 1.46 (95% CI 1.08 to 1.97; 3 RCTs, 1295 participants; moderate-certainty evidence); and diplopia 4.60 (95% CI 2.53 to 8.38; 3 RCTs, 1295 participants; low-certainty evidence) [10] | N=131<br>6.9%/6.1%                                                      | N=25<br>0/0                                 | -                                                                                                                                                                                                   |
| Lamotrigine (LTG)            | 14 trials (1806 participants) identified. Ataxia 3.34 (99% CI 2.01 to 5.55; 12 trials; 1525 participants; high-certainty evidence); dizziness 2.00 (99% CI 1.52 to 2.64; 13 trials; 1768 participants; moderate-certainty evidence); diplopia 3.79 (99% CI 2.15 to 6.68; 3 trials, 944 participants; high-certainty evidence); nausea 1.81 (99% CI 1.22 to 2.68; 12 studies, 1486 participants; moderate-certainty evidence) [11]                                                                                                                                                                                                                                                                                    | N=2337<br>4.2%/0.9%<br>Lower rates of irritability and depressive mood  | N=396<br>3.0%/1.0%                          | -                                                                                                                                                                                                   |
| Vigabatrine (VGB)            | 11 trials (756 people) Dizziness/light-headedness (RR 1.74, 95% CI 1.05 to 2.87; 9 studies; low-certainty evidence), fatigue (RR 1.65, 95% CI 1.08 to 2.51; 9 studies; low-certainty evidence), <b>drowsiness (RR 1.70, 95% CI 1.18 to 2.44; 8 studies)</b> and <b>depression (RR 3.28, 95% CI 1.30 to 8.27; 6 studies)</b> [12]                                                                                                                                                                                                                                                                                                                                                                                     | N=75<br>10.7%/5.3%                                                      | N=30<br>6.7%/3.3%                           | -                                                                                                                                                                                                   |
| Lacosamide (LCM)             | 5 trials (2199 participants) identified Abnormal co-ordination (RR 6.12, 99% CI 1.35 to 27.77), blurred vision (RR 4.65, 99% CI 1.24 to 17.37), diplopia (RR 5.59, 99% CI 2.27 to 13.79), dizziness (RR 2.96, 99% CI 2.09 to 4.20), nausea                                                                                                                                                                                                                                                                                                                                                                                                                                                                           | N=354<br>5.1%/3.1%                                                      | N=33<br>9.1%/6.1%                           | -                                                                                                                                                                                                   |

| ASM Generation                | Cochrane review of RCTs for adjunctive therapy in DRE: AEs significantly associated with ASM                                                                                                                                                                                                                                                              | Chen et al: observational study of PBAEs /discontinuations due to PBAEs |                                             | Steinhoff et al [1]: SLR of observational studies evaluating irritability, anger, or aggression with BRV, LEV, PER, and TPM in adults with epilepsy: weighted mean incidences/discontinuation rates |
|-------------------------------|-----------------------------------------------------------------------------------------------------------------------------------------------------------------------------------------------------------------------------------------------------------------------------------------------------------------------------------------------------------|-------------------------------------------------------------------------|---------------------------------------------|-----------------------------------------------------------------------------------------------------------------------------------------------------------------------------------------------------|
|                               |                                                                                                                                                                                                                                                                                                                                                           | Adults with epilepsy (80% with DREs)* [2]                               | Children with epilepsy (80% with DREs)† [3] |                                                                                                                                                                                                     |
|                               | (RR 2.35, 99% CI 1.37 to 4.02), <b>somnolence (RR 2.04, 99% CI 1.22 to 3.41)</b> , vomiting (RR 2.94, 99% CI 1.54 to 5.64) [13]                                                                                                                                                                                                                           |                                                                         |                                             |                                                                                                                                                                                                     |
| Everolimus (EVR)              | -                                                                                                                                                                                                                                                                                                                                                         | -                                                                       | -                                           | -                                                                                                                                                                                                   |
| <b>Infrequent</b>             |                                                                                                                                                                                                                                                                                                                                                           |                                                                         |                                             |                                                                                                                                                                                                     |
| Bromide (Br)                  | -                                                                                                                                                                                                                                                                                                                                                         | -                                                                       | -                                           | -                                                                                                                                                                                                   |
| Felbamate (FLB)               | AEs reported by all four trials were headache, dizziness, and nausea [14]                                                                                                                                                                                                                                                                                 | N=184<br>3.8%/3.3%                                                      | N=54<br>3.7%/1.9%                           | -                                                                                                                                                                                                   |
| Carbamazepine (CBZ)           | -                                                                                                                                                                                                                                                                                                                                                         | N=1103<br>1.8%/0.7%<br>Lower rates of irritability                      | N=194<br>4.6%/0.5%                          | -                                                                                                                                                                                                   |
| Oxcarbazepine (OXC)           | 4 trials (1593 participants) identified. Ataxia (RR 2.54, 99% CI 0.86 to 7.54; random-effects model; 5 studies; moderate-certainty evidence); and <b>somnolence (RR 2.03, 99% CI 1.17 to 3.54; random-effects model; 6 studies; low-certainty evidence)</b> [16]                                                                                          | N=566<br>2.8%/1.2%                                                      | N=166<br>1.8%/0.6%                          |                                                                                                                                                                                                     |
| Eslicarbazepine acetate (ESL) | 7 trials (2185 participants) identified. Dizziness (RR 2.77, 99% CI 1.85 to 4.15); nausea (RR 2.55, 99% CI 1.39 to 4.67); <b>somnolence (RR 1.75, 99% CI 1.18 to 2.61)</b> ; diplopia (RR 4.07, 99% CI 1.86 to 8.89); and vomiting (RR 2.37, 99% CI 1.19 to 4.74) [17]                                                                                    | -                                                                       | -                                           |                                                                                                                                                                                                     |
| Phenytoin                     | -                                                                                                                                                                                                                                                                                                                                                         | N=816<br>2.9%/1.8%                                                      | N=109<br>2.8%/1.8%                          |                                                                                                                                                                                                     |
| Pregabalin (PGB)              | 11 trials (3949 participants) identified. Ataxia (RR 3.90, 99% CI 2.05 to 7.42); dizziness (RR 3.15, 99% CI 2.23 to 4.44); fatigue (RR 1.35, 99% CI 0.94 to 1.93); <b>somnolence (RR 2.05, 99% CI 1.49 to 2.81)</b> ; and weight gain (RR 4.35, 99% CI 2.34 to 8.11) [18]                                                                                 | N=502<br>4.4%/2.2%                                                      | N=24<br>8.3%/4.2%                           |                                                                                                                                                                                                     |
| Gabapentin (GBP)              | 6 trials identified. Ataxia 2.01 (99% CI 0.98 to 4.11; 3 studies, 787 participants; low-certainty evidence), dizziness 2.43 (99% CI 1.44 to 4.12; 6 studies, 1206 participants; moderate-certainty evidence), fatigue 1.95 (99% CI 0.99 to 3.82; 5 studies, 1161 participants; low-certainty evidence) and <b>somnolence 1.93 (99% CI 1.22 to 3.06)</b> ; | N=606<br>1.7%/0.8%                                                      | N=76<br>1.3%/1.3%                           |                                                                                                                                                                                                     |

|                |                                                                                              |                                                                         |                                             |                                                                                                                                                                                                     |
|----------------|----------------------------------------------------------------------------------------------|-------------------------------------------------------------------------|---------------------------------------------|-----------------------------------------------------------------------------------------------------------------------------------------------------------------------------------------------------|
| ASM Generation | Cochrane review of RCTs for adjunctive therapy in DRE: AEs significantly associated with ASM | Chen et al: observational study of PBAEs /discontinuations due to PBAEs |                                             | Steinhoff et al [1]: SLR of observational studies evaluating irritability, anger, or aggression with BRV, LEV, PER, and TPM in adults with epilepsy: weighted mean incidences/discontinuation rates |
|                |                                                                                              | Adults with epilepsy (80% with DREs)* [2]                               | Children with epilepsy (80% with DREs)† [3] |                                                                                                                                                                                                     |
|                | <b>6 studies, 1206 participants; moderate-certainty evidence)</b><br>[19]                    |                                                                         |                                             |                                                                                                                                                                                                     |

Red= significantly associated with increased PBSE rates; green=significantly associated/trend with a decreased PBSE rates

\*79.8% (3261/4085) of the study population had seizures that failed to improve with two or more ASMs

†80.4% (741/922) of the study population had seizures that failed to improve with two or more ASMs

## References

1. Steinhoff BJ, Klein P, Klitgaard H, et al. Behavioral adverse events with brivaracetam, levetiracetam, perampanel, and topiramate: A systematic review. *Epilepsy & Behavior*. 2021;118:107939. <https://doi.org/10.1016/j.yebeh.2021.107939>
2. Chen B, Choi H, Hirsch LJ, et al. Psychiatric and behavioral side effects of antiepileptic drugs in adults with epilepsy. *Epilepsy Behav*. 2017;76:24-31. DOI: 10.1016/j.yebeh.2017.08.039
3. Chen B, Detyniecki K, Choi H, et al. Psychiatric and behavioral side effects of anti-epileptic drugs in adolescents and children with epilepsy. *Eur J Paediatr Neurol*. 2017;21(3):441-9. DOI: 10.1016/j.ejpn.2017.02.003
4. Bresnahan R, Martin-McGill KJ, Williamson J, et al. Clobazam add-on therapy for drug-resistant epilepsy. *Cochrane Database of Systematic Reviews*. 2019;10.1002/14651858.CD004154.pub5(10). DOI: 10.1002/14651858.CD004154.pub5
5. Bresnahan R, Hounsome J, Jette N, et al. Topiramate add-on therapy for drug-resistant focal epilepsy. *Cochrane Database Syst Rev*. 2019;10(10):Cd001417. DOI: 10.1002/14651858.CD001417.pub4
6. Mbizvo GK, Chandrasekar B, Nevitt SJ, et al. Levetiracetam add-on for drug-resistant focal epilepsy. *Cochrane Database of Systematic Reviews*. 2020;10.1002/14651858.CD001901.pub3(6). DOI: 10.1002/14651858.CD001901.pub3
7. Bresnahan R, Panebianco M, Marson AG. Brivaracetam add-on therapy for drug-resistant epilepsy. *Cochrane Database of Systematic Reviews*. 2022;10.1002/14651858.CD011501.pub3(3). DOI: 10.1002/14651858.CD011501.pub3
8. Brigo F, Lattanzi S, Igwe SC, et al. Zonisamide add-on therapy for focal epilepsy. *Cochrane Database Syst Rev*. 2020;7(7):Cd001416. DOI: 10.1002/14651858.CD001416.pub5
9. Brigo F, Igwe SC, Bragazzi NL. Stiripentol add-on therapy for drug-resistant focal epilepsy. *Cochrane Database Syst Rev*. 2020;5(5):Cd009887. DOI: 10.1002/14651858.CD009887.pub5
10. Panebianco M, Prabhakar H, Marson AG. Rufinamide add-on therapy for drug-resistant epilepsy. *Cochrane Database of Systematic Reviews*. 2020;10.1002/14651858.CD011772.pub3(11). DOI: 10.1002/14651858.CD011772.pub3
11. Panebianco M, Bresnahan R, Ramaratnam S, et al. Lamotrigine add-on therapy for drug-resistant focal epilepsy. *Cochrane Database Syst Rev*. 2020;3(3):Cd001909. DOI: 10.1002/14651858.CD001909.pub3
12. Bresnahan R, Gianatsi M, Maguire MJ, et al. Vigabatrin add-on therapy for drug-resistant focal epilepsy. *Cochrane Database Syst Rev*. 2020;7(7):Cd007302. DOI: 10.1002/14651858.CD007302.pub3
13. Babar RK, Bresnahan R, Gillespie CS, et al. Lacosamide add-on therapy for focal epilepsy. *Cochrane Database of Systematic Reviews*. 2021;10.1002/14651858.CD008841.pub3(5). DOI: 10.1002/14651858.CD008841.pub3
14. Shi LL, Bresnahan R, Martin-McGill KJ, et al. Felbamate add-on therapy for drug-resistant focal epilepsy. *Cochrane Database of Systematic Reviews*. 2019;10.1002/14651858.CD008295.pub5(8). DOI: 10.1002/14651858.CD008295.pub5
15. Lu C, Zheng J, Cao Y, et al. Carisbamate add-on therapy for drug-resistant focal epilepsy. *Cochrane Database of Systematic Reviews*. 2021;10.1002/14651858.CD012121.pub2(12). DOI: 10.1002/14651858.CD012121.pub2
16. Bresnahan R, Atim-Oluk M, Marson AG. Oxcarbazepine add-on for drug-resistant focal epilepsy. *Cochrane Database of Systematic Reviews*. 2020;10.1002/14651858.CD012433.pub2(3). DOI: 10.1002/14651858.CD012433.pub2
17. Chang XC, Yuan H, Wang Y, et al. Eslicarbazepine acetate add-on therapy for drug-resistant focal epilepsy. *Cochrane Database of Systematic Reviews*. 2021;10.1002/14651858.CD008907.pub4(6). DOI: 10.1002/14651858.CD008907.pub4

18. Panebianco M, Bresnahan R, Marson AG. Pregabalin add-on for drug-resistant focal epilepsy. Cochrane Database of Systematic Reviews. 2022;10.1002/14651858.CD005612.pub5(3). DOI: 10.1002/14651858.CD005612.pub5
19. Panebianco M, Al-Bachari S, Hutton JL, et al. Gabapentin add-on treatment for drug-resistant focal epilepsy. Cochrane Database Syst Rev. 2021;1(1):Cd001415. DOI: 10.1002/14651858.CD001415.pub4
